**A**

| Raw iTRAQ counts                            |                                  |                         |          |           |             |             |             |
|---------------------------------------------|----------------------------------|-------------------------|----------|-----------|-------------|-------------|-------------|
| protein description                         | peptide sequence                 | peptide modification(s) | wildtype | VVEL293MM | nucleosomes | nucleosomes | nucleosomes |
| Histon H3.1 (human)                         | DIQLAR                           |                         | 2348     | 2349.9    | 2834        | 2865        | 2865        |
| Histon H3.1 (human)                         | EIAQDFK                          | iTRAQ                   | 641.42   | 177.85    | 4692.1      | 6090.3      | 6090.3      |
| Histon H3.1 (human)                         | EIAQDFKTDLR                      |                         | 1689     | 1871      | 92.33       | 0           | 0           |
| Histon H3 (human)                           | FQSSAIGALQEASEAYLVGLFEDTNLCAIHAK | iTRAQ8plex (K)          | 97.44    | 139.66    | 100.5       | 82.32       | 82.32       |
| Histon H3.1 (human)                         | FQSSAVMALQEACEAYLVGLFEDTNLCAIHAK | iTRAQ8plex (K)          | 50.37    | 201.61    | 183.53      | 143.49      | 143.49      |
| Histon H3.2 (human)                         | FQSSAVMALQEASEAYLVGLFEDTNLCAIHAK | iTRAQ8plex (K)          | 212.85   | 217.31    | 37.39       | 43.53       | 43.53       |
| *Other methylation detected in all proteins |                                  |                         |          |           |             |             |             |
| Heat shock cognate 71 kDa                   | IINEPTAAAIAIYGLDK                | Dimethyl (K)            | 349.5    | 124.7     | 90.02       | 119.2       | 119.2       |
| Dot1L (human)                               | SPVGAEPAYYPWPLPVYDKHHDAAEHIIETIR | Trimethyl (K)           | 26.76    | 27.63     | 0           | 0           | 0           |

  

| iTRAQ ratios                                |                                  |                         |          |           |             |             |             |
|---------------------------------------------|----------------------------------|-------------------------|----------|-----------|-------------|-------------|-------------|
| protein description                         | peptide sequence                 | peptide modification(s) | wildtype | VVEL293MM | nucleosomes | nucleosomes | nucleosomes |
| Histon H3.1 (human)                         | DIQLAR                           |                         | 1        | 1.00      | 1.21        | 1.22        | 1.22        |
| Histon H3.1 (human)                         | EIAQDFK                          | iTRAQ 8plex (K)         | 1        | 0.28      | 7.32        | 9.50        | 9.50        |
| Histon H3.1 (human)                         | EIAQDFKTDLR                      | Dimethyl (K)            | 1        | 1.11      | 0.05        | 0           | 0           |
| Histon H3 (human)                           | FQSSAIGALQEASEAYLVGLFEDTNLCAIHAK | iTRAQ8plex (K)          | 1        | 1.43      | 1.03        | 0.84        | 0.84        |
| Histon H3.1 (human)                         | FQSSAVMALQEACEAYLVGLFEDTNLCAIHAK | iTRAQ8plex (K)          | 1        | 4.00      | 3.64        | 2.85        | 2.85        |
| Histon H3.2 (human)                         | FQSSAVMALQEASEAYLVGLFEDTNLCAIHAK | iTRAQ8plex (K)          | 1        | 1.02      | 0.18        | 0.20        | 0.20        |
| *Other methylation detected in all proteins |                                  |                         |          |           |             |             |             |
| Heat shock cognate 71 kDa                   | IINEPTAAAIAIYGLDK                | Dimethyl (K)            | 1        | 0.357     | 0.258       | 0.341       | 0.341       |
| Dot1L (human)                               | SPVGAEPAYYPWPLPVYDKHHDAAEHIIETIR | Trimethyl (K)           | 1        | 1.033     | 0           | 0           | 0           |

**B**

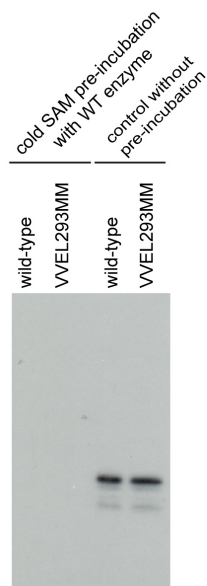

**S2 Fig. DOT1L VVEL293MM does not exhibit neomorphic activity on nucleosome substrates.** (A) iTRAQ experiments did not detect neomorphic methyltransferase activity for the mutant enzyme. All methylated peptides from the experiment are tabulated and shown as raw iTRAQ counts (top) or iTRAQ ratios normalized to the wild-type protein reaction (bottom). (B) Nucleosomes that were first incubated with wild-type enzyme and S-adenosyl methionine did not show subsequent transfer of radiolabeled methyl groups in the presence of either additional wild-type (lane 1) or mutant protein (lane 2). Both preparations of the enzyme were active as demonstrated by radiolabeled methyl transfer (lanes 3 and 4), consistent with previous observations.
