# Supplementary material for: Rapid generation of drug-resistance alleles at endogenous loci using CRISPR-Cas9 indel mutagenesis
Source: PLOS journal article supplement (doi:10.1371/journal.pone.0172177), 2017-02-23
Supplement: S1 (10.1371/journal.pone.0172177.s001) [file journal.pone.0172177.s001]

## Supporting information

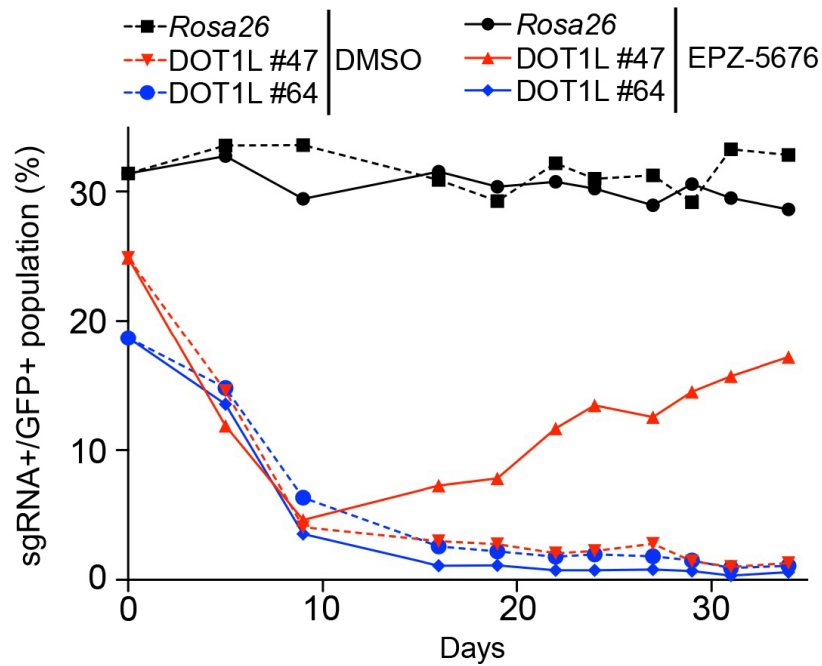

**S1 Fig.** A proliferation competition assay of RN2c cells transduced with indicated sgRNAs under the treatment of EPZ-5676 or DMSO show that DOT1L sgRNA #47 induced mutant(s) confer RN2c resistance to EPZ-5676. An sgRNA targeting a Rosa locus and a random sgRNA targeting DOT1L KMT domain (DOT1L sgRNA #64) served as negative controls.
